# Supplementary material
Source: publisher site journal article supplement (https://www.dovepress.com/article/280735)
Supplement: Supplementary file 1 [file get_supplementary_file.php]

**Supplementary information: Review protocol**

**Review Title**

**Non-surgical interventions for hospitalised adults with Class II or Class III obesity: scoping review** protocol.

Merridie Rees, Clare E Collins, Vanessa M McDonald

**Citation**

Merridie Rees, Clare E Collins, Vanessa M McDonald. Non-surgical inpatient interventions of adult patients with Class II and Class III clinically severe obesity: a scoping review protocol.

**Review Question/s**

This project aims to provide an overview of the existing literature, describing interventions for non-surgical inpatient care within acute and rehabilitation hospitals of adult patients with Class II or Class III obesity.

The review process will focus on the following questions:

1. What are the non-surgical interventions used in the acute and rehabilitation hospital settings for the care of the adult patient with Class II or III obesity?
2. What are the features of these interventions?
3. What is the format of these interventions?
4. What are the outcomes of these interventions?

**Searches**

The search strategy aims to find both published and unpublished studies from 1990-2017 written in English. The lower date in the range was selected due to the advances in treatment for obesity from this time with advances in pharmacological interventions and the development of national guidelines in several countries. (Bray, Fruhbeck, Ryan, & Wilding, 2016; Gunther et al., 2012; NH&MRC & Council, 2013; Turner et al., 2015) An initial limited search of MEDLINE and CINAHL was undertaken to identify articles within the subject of interest, followed by the analysis of the text words contained in the titles and abstracts, and of the index terms used to describe these articles. This will inform the development of a secondary search strategy including identified keywords and index terms which will be tailored for each information source. A third search will be the searching of the reference lists of all included studies to identify further relevant studies.

The databases to be searched include:

MEDLINE (Ovid); CINAHL (EBSCO); EMBASE (Ovid); PsychInfo (Ovid); Cochrane Library; and Scopus.

The search for unpublished studies will include:

Mednar; Clinical Trials Registry (clinical-trials.gov); Theses from Australian Digital Theses Program and Dissertation and Abstracts and ProQuest; Australian NH&MRC Guidelines, American Guidelines, New Zealand Guidelines, PROSPERO, Australian Policy online and Open Grey.

**Study Types**

This scoping review will include both quantitative and qualitative studies and systematic reviews including meta-analysis and meta-synthesis.

Quantitative studies will include observational (cross-sectional or time-series); descriptive observational study designs (case series, individual case reports and descriptive cross-sectional studies); experimental and quasi-experimental study designs, (randomized controlled trials, non-randomized controlled trials, before and after studies and interrupted time-series studies). In addition, analytical observational studies (prospective and retrospective cohort studies, case-control studies and analytical cross-sectional studies) will be considered for inclusion.

Qualitative studies will be considered; the methods will include but will not be limited to phenomenology, grounded theory, ethnography, qualitative description, and action research. Text and opinion papers will also be considered.

(Studies with combined surgical and non-surgical interventions where the non-surgical results are reported separately from the surgical interventions will be included.)

**Condition or domain being studied**

Interventions for adult patients in acute or rehabilitation hospitals with Class II or III obesity.

**Participants / population**

Participants included are adults (over 18 years of age) with Class II or III obesity receiving an inpatient non-surgical intervention in an acute or rehabilitation hospital.

**Intervention(s), exposure**

This review includes all non-surgical interventions received by the target population within the inpatient setting.

**Comparator**

There is no comparator or control in this study.

**Context**

**Primary Outcomes**

The primary outcomes of interest are the medical, physical, psychological and nutritional interventions received by the target group and their features including chronic disease management, diet, exercise, psychological interventions. The format of the interventions includes length of stay, discipline of person delivering intervention, and models of care are also primary outcomes of interest.

**Secondary Outcomes**

Secondary outcomes of interest include the outcomes of these interventions and their effectiveness in improving patient health outcomes measured by medical, physical, psychological and nutritional outcomes.

**Data Extraction**

A PRISMA flowchart will be used to identify the decision process for paper selection (Appendix II).(Peters et al., 2015; The Joanna Briggs Institute, 2014) Data will be extracted from papers included in the scoping review by two independent reviewers and summarized using Tables 1 and 2 (Appendix III). The data extracted will include specific details about the publication details, country, year, populations, concept, context, study design, sampling methodology, findings, analysis and reporting. Any disagreements that arise between the reviewers will be resolved through discussion, with or without a third reviewer. Authors of papers will be contacted to request missing or additional data where required. The draft data extraction tools will be modified and revised as necessary during the process of extracting data from each included study. Modifications will be detailed in the full scoping review report.

**Data Mapping**

The extracted data will be presented in diagrammatic or tabular form in a manner that aligns to the objectives and scope of this scoping review. The Appendix III tables and charts will report on; distribution of studies by year or period of publication, countries of origin, area of practice (clinical, policy, educational, etc.), interventions, model of care, features of interventions, clinical outcomes and research methods. A narrative summary will accompany the tabulated and/or charted results and will describe how the results relate to the reviews’ objective and questions.

**Contact details for further information**

Merridie.Rees@uon.edu.au

**Organisational affiliation of the review**

University of Newcastle NSW Australia

**Acknowledgements**

This scoping review is to contribute towards a degree of Doctor of Philosophy – Nursing and is supported by an Australian Government Research Training Scholarship. Debbie Booth (Medical Librarian) University of Newcastle assisted with the electronic search identification of terms and strategies.

**Review team members and their organisation affiliations**

Merridie Rees Hunter New England Local Health District and The School of Nursing and Midwifery, University of Newcastle, NSW Australia.

Clare E CollinsPriority Research Center for Physical Activity and Nutrition and The School of Health Sciences, University of Newcastle, NSW Australia

Vanessa M McDonald Priority Research Center for Healthy Lungs and The School of Nursing and Midwifery, University of Newcastle, NSW Australia.

**Anticipated or actual start date**

5 February 2016

**Anticipated completion date**

30 May 2019

**Conflicts of interest**

No conflicts of interest

**Language**

English

**Country**

Australia

**Stage of Review**

Review_Ongoing

**Subject index terms and status**

**Subject index terms**

Acute; comorbidity; hospitalization; obesity; rehabilitation; inpatient; body mass index.
